# Supplementary material for: Phylogeography, taxonomy, and conservation of the endangered brown howler monkey, Alouatta guariba (Primates, Atelidae), of the Atlantic Forest
Source: Front Genet. 2024 Dec 3;15:1453005. doi: 10.3389/fgene.2024.1453005 (PMC11683736; doi:10.3389/fgene.2024.1453005)
Supplement: Supplementary file 5 [file Table1.XLSX]

## Sheet: Total sampling
	Sample name	Microsatellites	CR	CR Haplotype (CLADE)	Cit-B	Cit-B Haplotype (CLADE)	Country, State	Sampling cities/municipality	Coordinates Lat	Coordinates Long	Precise Coordenates	Centroid of municipality or protected area	Centroid of the species range in the state	Type of sample	Details and remarks	IUCN	ICMBio/CPB	Gregorin, 2006	Povill et al., 2023
1	BG17 = A.g.g.17_BA		CR	Hap3 (A)			Brazil, BA	Pouso Alegre	-15.7861	-40.2932	X			Feces	Feces sample collected during fieldwork.	A.g.guariba	A.g.guariba	A.clamitans (=A.g.clamitans)	A.g.guariba
2	AG201		<300		Citb	Hap2 (B)	Brazil, MG	Fazenda Santa Rosa, Pedra Azul	-16.0301	-40.9559	X			Feces	Feces sample collected during fieldwork.	A.g.guariba	A.g.guariba	A.clamitans (=A.g.clamitans)	A.g.guariba
3	AG202		CR	Hap6 (A)			Brazil, MG	Fazenda Santa Rosa, Pedra Azul	-16.0301	-40.9559	X			Feces	Feces sample collected during fieldwork.	A.g.guariba	A.g.guariba	A.clamitans (=A.g.clamitans)	A.g.guariba
4	AG203		CR	Hap7 (B)			Brazil, MG	Fazenda Santa Rosa, Pedra Azul	-16.0301	-40.9559	X			Feces	Feces sample collected during fieldwork.	A.g.guariba	A.g.guariba	A.clamitans (=A.g.clamitans)	A.g.guariba
5	AG204		<300				Brazil, MG	Fazenda Santa Rosa, Pedra Azul	-16.0301	-40.9559	X			Feces	Feces sample collected during fieldwork.	A.g.guariba	A.g.guariba	A.clamitans (=A.g.clamitans)	A.g.guariba
6	AG205		CR	Hap7 (B)			Brazil, MG	Fazenda Santa Rosa, Pedra Azul	-16.0301	-40.9559	X			Feces	Feces sample collected during fieldwork.	A.g.guariba	A.g.guariba	A.clamitans (=A.g.clamitans)	A.g.guariba
7	AG206	STR	CR	Hap7 (B)	Citb	Hap2 (B)	Brazil, MG	Fazenda Santa Rosa, Pedra Azul	-16.0301	-40.9559	X			Feces	Feces sample collected during fieldwork.	A.g.guariba	A.g.guariba	A.clamitans (=A.g.clamitans)	A.g.guariba
8	AG207	STR	CR	Hap6 (A)	Citb	Hap1 (A)	Brazil, MG	Fazenda Santa Rosa, Pedra Azul	-16.0301	-40.9559	X			Feces	Feces sample collected during fieldwork.	A.g.guariba	A.g.guariba	A.clamitans (=A.g.clamitans)	A.g.guariba
9	BG25		<300				Brazil, MG	Jequitinhonha	-16.3481	-41.0597	X			Feces	Feces sample collected during fieldwork.	A.g.guariba	A.g.guariba	A.clamitans (=A.g.clamitans)	A.g.guariba
10	BG20		CR	Hap4 (B)			Brazil, MG	Felisburgo	-16.7933	-40.7971	X			Feces	Feces sample collected during fieldwork.	A.g.clamitans	A.g.guariba	A.clamitans (=A.g.clamitans)	A.g.guariba
11	BG21		CR	Hap4 (B)			Brazil, MG	Felisburgo	-16.7933	-40.7971	X			Feces	Feces sample collected during fieldwork.	A.g.clamitans	A.g.guariba	A.clamitans (=A.g.clamitans)	A.g.guariba
12	BG22		CR	Hap4 (B)			Brazil, MG	Felisburgo	-16.7933	-40.7971	X			Feces	Feces sample collected during fieldwork.	A.g.clamitans	A.g.guariba	A.clamitans (=A.g.clamitans)	A.g.guariba
13	BG23		short				Brazil, MG	Felisburgo	-16.7933	-40.7971	X			Feces	Feces sample collected during fieldwork.	A.g.clamitans	A.g.guariba	A.clamitans (=A.g.clamitans)	A.g.guariba
14	AG45	STR	CR	Hap35 (A)			Brazil, MG	RPPN Feliciano Miguel Abdala, Caratinga	-19.7232	-41.8063	X			Feces	Feces sample collected during fieldwork.	A.g.clamitans	A.g.clamitans	A.clamitans (=A.g.clamitans)	A.g.guariba
15	AG46	STR	CR	Hap35 (A)			Brazil, MG	RPPN Feliciano Miguel Abdala, Caratinga	-19.7232	-41.8063	X			Feces	Feces sample collected during fieldwork.	A.g.clamitans	A.g.clamitans	A.clamitans (=A.g.clamitans)	A.g.guariba
16	AG47		CR	Hap36 (B)			Brazil, MG	RPPN Feliciano Miguel Abdala, Caratinga	-19.7232	-41.8063	X			Feces	Feces sample collected during fieldwork.	A.g.clamitans	A.g.clamitans	A.clamitans (=A.g.clamitans)	A.g.guariba
17	AG48	STR	short				Brazil, MG	RPPN Feliciano Miguel Abdala, Caratinga	-19.7232	-41.8063	X			Feces	Feces sample collected during fieldwork.	A.g.clamitans	A.g.clamitans	A.clamitans (=A.g.clamitans)	A.g.guariba
18	AG51		CR	Hap35 (A)			Brazil, MG	RPPN Feliciano Miguel Abdala, Caratinga	-19.7232	-41.8063	X			Feces	Feces sample collected during fieldwork.	A.g.clamitans	A.g.clamitans	A.clamitans (=A.g.clamitans)	A.g.guariba
19	AG52	STR	CR	Hap35 (A)			Brazil, MG	RPPN Feliciano Miguel Abdala, Caratinga	-19.7232	-41.8063	X			Feces	Feces sample collected during fieldwork.	A.g.clamitans	A.g.clamitans	A.clamitans (=A.g.clamitans)	A.g.guariba
20	AG53		CR	Hap38 (A)			Brazil, MG	RPPN Feliciano Miguel Abdala, Caratinga	-19.7232	-41.8063	X			Feces	Feces sample collected during fieldwork.	A.g.clamitans	A.g.clamitans	A.clamitans (=A.g.clamitans)	A.g.guariba
21	AG54	STR	CR	Hap35 (A)			Brazil, MG	RPPN Feliciano Miguel Abdala, Caratinga	-19.7232	-41.8063	X			Feces	Feces sample collected during fieldwork.	A.g.clamitans	A.g.clamitans	A.clamitans (=A.g.clamitans)	A.g.guariba
22	AG55						Brazil, MG	RPPN Feliciano Miguel Abdala, Caratinga	-19.7232	-41.8063	X			Feces	Feces sample collected during fieldwork.	A.g.clamitans	A.g.clamitans	A.clamitans (=A.g.clamitans)	A.g.guariba
23	L17	STR					Brazil, MG?		-20.9825	-43.2897			X	Blood	500ul-1ml of whole blood collected from an individual kept at the Belo Horizonte Zoo, Minas Gerais, during routine care procedures at this institution, conducted under the technical responsibility of the Zoo's qualified team, including a veterinary doctor, duly authorized by the competent bodies for the supervision of ex situ keeping institutions.	?	?	?	?
24	L18	STR			Citb	Hap1 (A)	Brazil, MG?		-20.9825	-43.2897			X	Blood	500ul-1ml of whole blood collected from an individual kept at the Belo Horizonte Zoo, Minas Gerais, during routine care procedures at this institution, conducted under the technical responsibility of the Zoo's qualified team, including a veterinary doctor, duly authorized by the competent bodies for the supervision of ex situ keeping institutions.	?	?	?	?
25	L19		CR	Hap53 (B)	Citb	Hap5 (B)	Brazil, MG?		-20.9825	-43.2897			X	Blood	500ul-1ml of whole blood collected from an individual kept at the Belo Horizonte Zoo, Minas Gerais, during routine care procedures at this institution, conducted under the technical responsibility of the Zoo's qualified team, including a veterinary doctor, duly authorized by the competent bodies for the supervision of ex situ keeping institutions.	?	?	?	?
26	BG11 = A.g.g.11_ES		CR	Hap1 (A)			Brazil, ES	Sooretama	-19.1416	-40.0268	X			Feces	Feces sample collected during fieldwork.	A.g.clamitans	A.g.guariba	A.fusca (=A.g.guariba)	A.g.guariba
27	BG12 = A.g.g.12_ES		CR	Hap2 (B)			Brazil, ES	Sooretama	-19.1416	-40.0268	X			Feces	Feces sample collected during fieldwork.	A.g.clamitans	A.g.guariba	A.fusca (=A.g.guariba)	A.g.guariba
28	BG13 = A.g.g.13_ES		CR	Hap2 (B)			Brazil, ES	Sooretama	-19.1416	-40.0268	X			Feces	Feces sample collected during fieldwork.	A.g.clamitans	A.g.guariba	A.fusca (=A.g.guariba)	A.g.guariba
29	AG178		CR	Hap39 (A)			Brazil, ES	Pancas	-19.2299	-40.8505	X			Feces	Feces sample collected during fieldwork.	A.g.clamitans	A.g.guariba	A.fusca (=A.g.guariba)	A.g.guariba
30	AG179		<300				Brazil, ES	Pancas	-19.2299	-40.8505	X			Feces	Feces sample collected during fieldwork.	A.g.clamitans	A.g.guariba	A.fusca (=A.g.guariba)	A.g.guariba
31	AG180		<300				Brazil, ES	Pancas	-19.2299	-40.8505	X			Feces	Feces sample collected during fieldwork.	A.g.clamitans	A.g.guariba	A.fusca (=A.g.guariba)	A.g.guariba
32	AG181		<300				Brazil, ES	Pancas	-19.2299	-40.8505	X			Feces	Feces sample collected during fieldwork.	A.g.clamitans	A.g.guariba	A.fusca (=A.g.guariba)	A.g.guariba
33	AG182		<300				Brazil, ES	Pancas	-19.2299	-40.8505	X			Feces	Feces sample collected during fieldwork.	A.g.clamitans	A.g.guariba	A.fusca (=A.g.guariba)	A.g.guariba
34	AG183		CR	Hap40 (A)			Brazil, ES	Pancas	-19.2299	-40.8505	X			Feces	Feces sample collected during fieldwork.	A.g.clamitans	A.g.guariba	A.fusca (=A.g.guariba)	A.g.guariba
35	AG186		CR	Hap40 (A)			Brazil, ES	Pancas	-19.2299	-40.8505	X			Feces	Feces sample collected during fieldwork.	A.g.clamitans	A.g.guariba	A.fusca (=A.g.guariba)	A.g.guariba
36	BG9		CR	Hap5 (A)			Brazil, ES	Linhares	-19.4437	-40.0743	X			Feces	Feces sample collected during fieldwork.	A.g.clamitans	A.g.clamitans	A.fusca (=A.g.guariba)	A.g.guariba
37	BG10		CR	Hap5 (A)			Brazil, ES	Linhares	-19.4437	-40.0743	X			Feces	Feces sample collected during fieldwork.	A.g.clamitans	A.g.clamitans	A.fusca (=A.g.guariba)	A.g.guariba
38	AG49		CR	Hap37 (A)			Brazil, ES	Santa Maria de Jetibá	-20.0179	-40.7725	X			Feces	Feces sample collected during fieldwork.	A.g.clamitans	A.g.clamitans	A.fusca (=A.g.guariba)	A.g.guariba
39	AG50		CR	Hap37 (A)			Brazil, ES	Santa Maria de Jetibá	-20.0179	-40.7725	X			Feces	Feces sample collected during fieldwork.	A.g.clamitans	A.g.clamitans	A.fusca (=A.g.guariba)	A.g.guariba
40	AG56		CR	Hap37 (A)			Brazil, ES	Santa Maria de Jetibá	-20.0179	-40.7725	X			Feces	Feces sample collected during fieldwork.	A.g.clamitans	A.g.clamitans	A.fusca (=A.g.guariba)	A.g.guariba
41	AG184		CR	Hap41 (A)			Brazil, ES	Santa Maria de Jetibá	-20.0179	-40.7725	X			Feces	Feces sample collected during fieldwork.	A.g.clamitans	A.g.clamitans	A.fusca (=A.g.guariba)	A.g.guariba
42	AG185		<300				Brazil, ES	Santa Maria de Jetibá	-20.0179	-40.7725	X			Feces	Feces sample collected during fieldwork.	A.g.clamitans	A.g.clamitans	A.fusca (=A.g.guariba)	A.g.guariba
43	AG187	STR	CR	Hap37 (A)			Brazil, ES	Santa Maria de Jetibá	-20.0179	-40.7725	X			Feces	Feces sample collected during fieldwork.	A.g.clamitans	A.g.clamitans	A.fusca (=A.g.guariba)	A.g.guariba
44	AG188		<300				Brazil, ES	Santa Maria de Jetibá	-20.0179	-40.7725	X			Feces	Feces sample collected during fieldwork.	A.g.clamitans	A.g.clamitans	A.fusca (=A.g.guariba)	A.g.guariba
45	AG189		CR	Hap42 (A)	Citb	Hap1 (A)	Brazil, ES	FLONA Pacotuba, Cachoeiro de Itapemirim	-20.7455	-41.2924	X			Feces	Feces sample collected during fieldwork.	A.g.clamitans	A.g.clamitans	A.fusca (=A.g.guariba)	A.g.guariba
46	AG190		CR	Hap42 (A)			Brazil, ES	FLONA Pacotuba, Cachoeiro de Itapemirim	-20.7455	-41.2924	X			Feces	Feces sample collected during fieldwork.	A.g.clamitans	A.g.clamitans	A.fusca (=A.g.guariba)	A.g.guariba
47	AG191		CR	Hap43 (A)	Citb	Hap1 (A)	Brazil, ES	FLONA Pacotuba, Cachoeiro de Itapemirim	-20.7455	-41.2924	X			Feces	Feces sample collected during fieldwork.	A.g.clamitans	A.g.clamitans	A.fusca (=A.g.guariba)	A.g.guariba
48	AG192		CR	Hap44 (A)	Citb	Hap1 (A)	Brazil, ES	FLONA Pacotuba, Cachoeiro de Itapemirim	-20.7455	-41.2924	X			Feces	Feces sample collected during fieldwork.	A.g.clamitans	A.g.clamitans	A.fusca (=A.g.guariba)	A.g.guariba
49	AG193		CR	Hap44 (A)	Citb	Hap1 (A)	Brazil, ES	FLONA Pacotuba, Cachoeiro de Itapemirim	-20.7455	-41.2924	X			Feces	Feces sample collected during fieldwork.	A.g.clamitans	A.g.clamitans	A.fusca (=A.g.guariba)	A.g.guariba
50	AG194	STR	CR	Hap45 (A)			Brazil, ES	FLONA Pacotuba, Cachoeiro de Itapemirim	-20.7455	-41.2924	X			Feces	Feces sample collected during fieldwork.	A.g.clamitans	A.g.clamitans	A.fusca (=A.g.guariba)	A.g.guariba
51	AG195	STR	CR	Hap45 (A)	Citb	Hap1 (A)	Brazil, ES	FLONA Pacotuba, Cachoeiro de Itapemirim	-20.7455	-41.2924	X			Feces	Feces sample collected during fieldwork.	A.g.clamitans	A.g.clamitans	A.fusca (=A.g.guariba)	A.g.guariba
52	AG196	STR	CR	Hap46 (A)	Citb	Hap1 (A)	Brazil, ES	FLONA Pacotuba, Cachoeiro de Itapemirim	-20.7455	-41.2924	X			Feces	Feces sample collected during fieldwork.	A.g.clamitans	A.g.clamitans	A.fusca (=A.g.guariba)	A.g.guariba
53	AG197	STR	CR	Hap46 (A)	Citb	Hap1 (A)	Brazil, ES	FLONA Pacotuba, Cachoeiro de Itapemirim	-20.7455	-41.2924	X			Feces	Feces sample collected during fieldwork.	A.g.clamitans	A.g.clamitans	A.fusca (=A.g.guariba)	A.g.guariba
54	AG198	STR	CR	Hap47 (A)	Citb	Hap3 (A)	Brazil, ES	FLONA Pacotuba, Cachoeiro de Itapemirim	-20.7455	-41.2924	X			Feces	Feces sample collected during fieldwork.	A.g.clamitans	A.g.clamitans	A.fusca (=A.g.guariba)	A.g.guariba
55	AG200	STR	CR	Hap46 (A)			Brazil, ES	FLONA Pacotuba, Cachoeiro de Itapemirim	-20.7455	-41.2924	X			Feces	Feces sample collected during fieldwork.	A.g.clamitans	A.g.clamitans	A.fusca (=A.g.guariba)	A.g.guariba
56	X15	STR					Brazil, RJ	Parque Estadual do Desengano	-21.8235	-41.794		X		Feces	Feces sample collected during fieldwork.	A.g.clamitans	A.g.clamitans	A.fusca (=A.g.guariba)	A.g.guariba
57	S76	STR	CR	Hap84 (B)	Citb	Hap15 (B)	Brazil, RJ	Rio de Janeiro	-22.9232	-43.4509		X		Blood	500ul-1ml of whole blood collected from an individual kept at the Rio de Janeiro Zoo, Rio de Janeiro, during routine care procedures at this institution, conducted under the technical responsibility of the Zoo's qualified team, including a veterinary doctor, duly authorized by the competent bodies for the supervision of ex situ keeping institutions.	A.g.clamitans	A.g.clamitans	A.clamitans (=A.g.clamitans)	A.g.guariba
58	AG29	STR	CR	Hap25 (B)	Citb	Hap8 (B)	Brazil, RJ	Rio de Janeiro	-22.9272	-43.3132	X			Feces	Feces sample collected during fieldwork.	A.g.clamitans	A.g.clamitans	A.clamitans (=A.g.clamitans)	A.g.guariba
59	AG177		<300				Brazil, RJ	Ilha Grande, Angra dos Reis	-23.1304	-44.182	X			Feces	Feces sample collected during fieldwork.	A.g.clamitans	A.g.clamitans	A.clamitans (=A.g.clamitans)	A.g.guariba
60	AG28	STR					Brazil, SP	Campinas	-22.8698	-46.9407	X			Feces	Feces sample collected during fieldwork.	A.g.clamitans	A.g.clamitans	A.clamitans (=A.g.clamitans)	A.g.clamitans
61	L16				Citb	Hap2 (B)	Brazil, SP	Campinas	-22.8838	-47.0438		X		Feces	500ul-1ml of whole blood collected from an individual kept at the Pedreira Zoo, São Paulo, during routine care procedures at this institution, conducted under the technical responsibility of the Zoo's qualified team, including a veterinary doctor, duly authorized by the competent bodies for the supervision of ex situ keeping institutions.	A.g.clamitans	A.g.clamitans	A.clamitans (=A.g.clamitans)	A.g.clamitans
62	L22		CR	Hap54 (C)	Citb	Hap11 (C)	Brazil, SP	Campinas	-22.8838	-47.0438		X		Feces	500ul-1ml of whole blood collected from an individual kept at the Salvador Zoo, Bahia, during routine care procedures at this institution, conducted under the technical responsibility of the Zoo's qualified team, including a veterinary doctor, duly authorized by the competent bodies for the supervision of ex situ keeping institutions.	A.g.clamitans	A.g.clamitans	A.clamitans (=A.g.clamitans)	A.g.clamitans
63	AG16	STR	CR	Hap14 (A)	Citb	Hap1 (A)	Brazil, SP	Mairiporã	-23.2809	-46.5398	X			Feces	Feces sample collected during fieldwork.	A.g.clamitans	A.g.clamitans	A.clamitans (=A.g.clamitans)	A.g.guariba
64	AG19		CR	Hap13 (A)	Citb	Hap6 (A)	Brazil, SP	Mairiporã	-23.2809	-46.5398	X			Feces	Feces sample collected during fieldwork.	A.g.clamitans	A.g.clamitans	A.clamitans (=A.g.clamitans)	A.g.guariba
65	AG32	STR	CR	Hap28 (A)	Citb	Hap6 (A)	Brazil, SP	Mairiporã	-23.2809	-46.5398	X			Feces	Feces sample collected during fieldwork.	A.g.clamitans	A.g.clamitans	A.clamitans (=A.g.clamitans)	A.g.guariba
66	AG39	STR	CR	Hap14 (A)	Citb	Hap1 (A)	Brazil, SP	Mairiporã	-23.2809	-46.5398	X			Feces	Feces sample collected during fieldwork.	A.g.clamitans	A.g.clamitans	A.clamitans (=A.g.clamitans)	A.g.guariba
67	AG40	STR	CR	Hap9 (B)	Citb	Hap2 (B)	Brazil, SP	Mairiporã	-23.2809	-46.5398	X			Feces	Feces sample collected during fieldwork.	A.g.clamitans	A.g.clamitans	A.clamitans (=A.g.clamitans)	A.g.guariba
68	AG2		CR	Hap9 (B)	Citb	Hap2 (B)	Brazil, SP	Serra da Cantareira	-23.4156	-46.6017	X			Feces	Feces sample collected during fieldwork.	A.g.clamitans	A.g.clamitans	A.clamitans (=A.g.clamitans)	?
69	AG4	STR	CR	Hap11 (B)	Citb	Hap2 (B)	Brazil, SP	Serra da Cantareira	-23.4156	-46.6017	X			Feces	Feces sample collected during fieldwork.	A.g.clamitans	A.g.clamitans	A.clamitans (=A.g.clamitans)	?
70	AG6	STR					Brazil, SP	Serra da Cantareira	-23.4156	-46.6017	X			Feces	Feces sample collected during fieldwork.	A.g.clamitans	A.g.clamitans	A.clamitans (=A.g.clamitans)	?
71	AG7		CR	Hap13 (A)	Citb	Hap6 (A)	Brazil, SP	Serra da Cantareira	-23.4156	-46.6017	X			Feces	Feces sample collected during fieldwork.	A.g.clamitans	A.g.clamitans	A.clamitans (=A.g.clamitans)	?
72	AG8		CR	Hap14 (A)	Citb	Hap1 (A)	Brazil, SP	Serra da Cantareira	-23.4156	-46.6017	X			Feces	Feces sample collected during fieldwork.	A.g.clamitans	A.g.clamitans	A.clamitans (=A.g.clamitans)	?
73	AG9		CR	Hap15 (B)	Citb	Hap2 (B)	Brazil, SP	Serra da Cantareira	-23.4156	-46.6017	X			Feces	Feces sample collected during fieldwork.	A.g.clamitans	A.g.clamitans	A.clamitans (=A.g.clamitans)	?
74	AG11	STR	CR	Hap17 (B)	Citb	Hap2 (B)	Brazil, SP	Serra da Cantareira	-23.4156	-46.6017	X			Feces	Feces sample collected during fieldwork.	A.g.clamitans	A.g.clamitans	A.clamitans (=A.g.clamitans)	?
75	AG12		CR	Hap18 (A)	Citb	Hap6 (A)	Brazil, SP	Serra da Cantareira	-23.4156	-46.6017	X			Feces	Feces sample collected during fieldwork.	A.g.clamitans	A.g.clamitans	A.clamitans (=A.g.clamitans)	?
76	AG14	STR	CR	Hap9 (B)			Brazil, SP	Serra da Cantareira	-23.4156	-46.6017	X			Feces	Feces sample collected during fieldwork.	A.g.clamitans	A.g.clamitans	A.clamitans (=A.g.clamitans)	?
77	AG15		CR	Hap20 (C)			Brazil, SP	Serra da Cantareira	-23.4156	-46.6017	X			Feces	Feces sample collected during fieldwork.	A.g.clamitans	A.g.clamitans	A.clamitans (=A.g.clamitans)	?
78	AG17	STR	CR	Hap21 (C)	Citb	Hap7 (C)	Brazil, SP	Serra da Cantareira	-23.4156	-46.6017	X			Feces	Feces sample collected during fieldwork.	A.g.clamitans	A.g.clamitans	A.clamitans (=A.g.clamitans)	?
79	AG18	STR	CR	Hap22 (A)	Citb	Hap6 (A)	Brazil, SP	Serra da Cantareira	-23.4156	-46.6017	X			Feces	Feces sample collected during fieldwork.	A.g.clamitans	A.g.clamitans	A.clamitans (=A.g.clamitans)	?
80	AG22	STR	CR	Hap20 (C)	Citb	Hap4 (C)	Brazil, SP	Serra da Cantareira	-23.4156	-46.6017	X			Feces	Feces sample collected during fieldwork.	A.g.clamitans	A.g.clamitans	A.clamitans (=A.g.clamitans)	?
81	AG23		CR	Hap13 (A)			Brazil, SP	Serra da Cantareira	-23.4156	-46.6017	X			Feces	Feces sample collected during fieldwork.	A.g.clamitans	A.g.clamitans	A.clamitans (=A.g.clamitans)	?
82	AG25	STR	CR	Hap13 (A)			Brazil, SP	Serra da Cantareira	-23.4156	-46.6017	X			Feces	Feces sample collected during fieldwork.	A.g.clamitans	A.g.clamitans	A.clamitans (=A.g.clamitans)	?
83	AG27	STR	CR	Hap24 (C)			Brazil, SP	Serra da Cantareira	-23.4156	-46.6017	X			Feces	Feces sample collected during fieldwork.	A.g.clamitans	A.g.clamitans	A.clamitans (=A.g.clamitans)	?
84	AG30	STR	CR	Hap26 (A)	Citb	Hap9 (A)	Brazil, SP	Serra da Cantareira	-23.4156	-46.6017	X			Feces	Feces sample collected during fieldwork.	A.g.clamitans	A.g.clamitans	A.clamitans (=A.g.clamitans)	?
85	AG31	STR	CR	Hap27 (C)	Citb	Hap10 (C)	Brazil, SP	Serra da Cantareira	-23.4156	-46.6017	X			Feces	Feces sample collected during fieldwork.	A.g.clamitans	A.g.clamitans	A.clamitans (=A.g.clamitans)	?
86	AG38	STR	CR	Hap31 (C)	Citb	Hap12 (C)	Brazil, SP	Serra da Cantareira	-23.4156	-46.6017	X			Feces	Feces sample collected during fieldwork.	A.g.clamitans	A.g.clamitans	A.clamitans (=A.g.clamitans)	?
87	AG13	STR	CR	Hap19 (C)	Citb	Hap4 (C)	Brazil, SP	Horto Florestal, São Paulo	-23.4525	-46.6337	X			Feces	Feces sample collected during fieldwork.	A.g.clamitans	A.g.clamitans	A.clamitans (=A.g.clamitans)	?
88	AG20	STR	CR	Hap23 (B)	Citb	Hap2 (B)	Brazil, SP	Horto Florestal, São Paulo	-23.4525	-46.6337	X			Feces	Feces sample collected during fieldwork.	A.g.clamitans	A.g.clamitans	A.clamitans (=A.g.clamitans)	?
89	AG36	STR	CR	Hap28 (A)	Citb	Hap6 (A)	Brazil, SP	Horto Florestal, São Paulo	-23.4525	-46.6337	X			Feces	Feces sample collected during fieldwork.	A.g.clamitans	A.g.clamitans	A.clamitans (=A.g.clamitans)	?
90	AG37	STR	CR	Hap8 (C)	Citb	Hap4 (C)	Brazil, SP	Bairro Santo Amaro, São Paulo	-23.6491	-46.6923	X			Feces	Feces sample collected during fieldwork.	A.g.clamitans	A.g.clamitans	A.clamitans (=A.g.clamitans)	?
91	AG10		CR	Hap16 (C)	Citb	Hap4 (C)	Brazil, SP	Itapetininga	-23.651	-48.2246	X			Feces	Feces sample collected during fieldwork.	A.g.clamitans	A.g.clamitans	A.clamitans (=A.g.clamitans)	?
92	AG35	STR	CR	Hap30 (B)	Citb	Hap2 (B)	Brazil, SP	Parque Estadual das Fontes do Ipiranga, São Paulo	-23.6708	-46.6289	X			Feces	Feces sample collected during fieldwork.	A.g.clamitans	A.g.clamitans	A.clamitans (=A.g.clamitans)	?
93	AG42	STR	CR	Hap32 (A)	Citb	Hap1 (A)	Brazil, SP	Parque Estadual das Fontes do Ipiranga, São Paulo	-23.6708	-46.6289	X			Feces	Feces sample collected during fieldwork.	A.g.clamitans	A.g.clamitans	A.clamitans (=A.g.clamitans)	?
94	AG44	STR	CR	Hap34 (A)	Citb	Hap6 (A)	Brazil, SP	Parque Estadual das Fontes do Ipiranga, São Paulo	-23.6708	-46.6289	X			Feces	Feces sample collected during fieldwork.	A.g.clamitans	A.g.clamitans	A.clamitans (=A.g.clamitans)	?
95	AG41	STR			Citb	Hap2 (B)	Brazil, SP	Bairro Água Funda, São Paulo	-23.6708	-46.6289	X			Feces	Feces sample collected during fieldwork.	A.g.clamitans	A.g.clamitans	A.clamitans (=A.g.clamitans)	?
96	AG21		CR	Hap10 (C)	Citb	Hap4 (C)	Brazil, SP	Jardim Varginha, São Paulo	-23.7899	-46.6867	X			Feces	Feces sample collected during fieldwork.	A.g.clamitans	A.g.clamitans	A.clamitans (=A.g.clamitans)	?
97	AG1	STR	CR	Hap8 (C)	Citb	Hap4 (C)	Brazil, SP	Parelheiro	-23.8318	-46.7325	X			Feces	Feces sample collected during fieldwork.	A.g.clamitans	A.g.clamitans	A.clamitans (=A.g.clamitans)	?
98	AG3	STR	CR	Hap10 (C)	Citb	Hap4 (C)	Brazil, SP	Parelheiro	-23.8318	-46.7325	X			Feces	Feces sample collected during fieldwork.	A.g.clamitans	A.g.clamitans	A.clamitans (=A.g.clamitans)	?
99	AG5	STR	CR	Hap12(B)	Citb	Hap5 (B)	Brazil, SP	Parelheiro	-23.8318	-46.7325	X			Feces	Feces sample collected during fieldwork.	A.g.clamitans	A.g.clamitans	A.clamitans (=A.g.clamitans)	?
100	AG33	STR	CR	Hap8 (C)	Citb	Hap4 (C)	Brazil, SP	Parelheiro	-23.8318	-46.7325	X			Feces	Feces sample collected during fieldwork.	A.g.clamitans	A.g.clamitans	A.clamitans (=A.g.clamitans)	?
101	AG34	STR	CR	Hap29 (C)	Citb	Hap11 (C)	Brazil, SP	Embu-Guaçu	-23.8984	-46.8362	X			Feces	Feces sample collected during fieldwork.	A.g.clamitans	A.g.clamitans	A.clamitans (=A.g.clamitans)	?
102	AG43	STR	CR	Hap33 (C)	Citb	Hap11 (C)	Brazil, SP	Ibiúna	-23.9107	-47.2694	X			Feces	Feces sample collected during fieldwork.	A.g.clamitans	A.g.clamitans	A.clamitans (=A.g.clamitans)	?
103	5A*		CR	Hap107 (C)			Brazil, PR	Mata do Bugio, Alto Paraiso	-23.3761	-53.7661	X			Feces	Feces sample collected during fieldwork.	A.g.clamitans	A.g.clamitans	A.clamitans (=A.g.clamitans)	A.g.clamitans
104	20A*		CR	Hap107 (C)			Brazil, PR	Mata do Bugio, Alto Paraiso	-23.3762	-53.7645	X			Feces	Feces sample collected during fieldwork.	A.g.clamitans	A.g.clamitans	A.clamitans (=A.g.clamitans)	A.g.clamitans
105	24A*		CR	Hap117 (C)			Brazil, PR	Mata do Bugio, Alto Paraiso	-23.3762	-53.7645	X			Feces	Feces sample collected during fieldwork.	A.g.clamitans	A.g.clamitans	A.clamitans (=A.g.clamitans)	A.g.clamitans
106	33A*		CR	Hap107 (C)			Brazil, PR	Mata do Bugio, Alto Paraiso	-23.3762	-53.7645	X			Feces	Feces sample collected during fieldwork.	A.g.clamitans	A.g.clamitans	A.clamitans (=A.g.clamitans)	A.g.clamitans
107	3A*		CR	Hap107 (C)			Brazil, PR	Mata do Bugio, Alto Paraiso	-23.3803	-53.7675	X			Feces	Feces sample collected during fieldwork.	A.g.clamitans	A.g.clamitans	A.clamitans (=A.g.clamitans)	A.g.clamitans
108	18AA*		CR	Hap107 (C)			Brazil, PR	Mata do Bugio, Alto Paraiso	-23.3883	-53.7616	X			Feces	Feces sample collected during fieldwork.	A.g.clamitans	A.g.clamitans	A.clamitans (=A.g.clamitans)	A.g.clamitans
109	16A*		CR	Hap107 (C)			Brazil, PR	Mata do Bugio, Alto Paraiso	-23.3883	-53.7616	X			Feces	Feces sample collected during fieldwork.	A.g.clamitans	A.g.clamitans	A.clamitans (=A.g.clamitans)	A.g.clamitans
110	12A*		CR	Hap107 (C)			Brazil, PR	Mata do Bugio, Alto Paraiso	-23.3883	-53.7616	X			Feces	Feces sample collected during fieldwork.	A.g.clamitans	A.g.clamitans	A.clamitans (=A.g.clamitans)	A.g.clamitans
111	27A*		CR	Hap107 (C)			Brazil, PR	Mata do Bugio, Alto Paraiso	-23.3883	-53.7616	X			Feces	Feces sample collected during fieldwork.	A.g.clamitans	A.g.clamitans	A.clamitans (=A.g.clamitans)	A.g.clamitans
112	S58	STR	CR	Hap71 (C)	Citb	Hap11 (C)	Brazil, SC	Joinville	-26.2442	-48.9514		X		Tissue	~1cm³ of muscle collected from a carcass kept in the collection of the Bugio Project, CEPESBI/FURB, Santa Catarina, with the appropriate authorization from the competent bodies.	A.g.clamitans	A.g.clamitans	A.clamitans (=A.g.clamitans)	A.g.clamitans
113	S67	STR	CR	Hap79 (C)	Citb	Hap11 (C)	Brazil, SC	São Bento do Sul	-26.2955	-49.3506		X		Tissue	~1cm³ of muscle collected from a carcass kept in the collection of the Bugio Project, CEPESBI/FURB, Santa Catarina, with the appropriate authorization from the competent bodies.	A.g.clamitans	A.g.clamitans	A.clamitans (=A.g.clamitans)	A.g.clamitans
114	L24	STR	CR	Hap55 (C)	Citb	Hap11 (C)	Brazil, SC	São Bento do Sul	-26.2955	-49.3506		X		Tissue	~1cm³ of muscle collected from a carcass kept in the collection of the Bugio Project, CEPESBI/FURB, Santa Catarina, with the appropriate authorization from the competent bodies.	A.g.clamitans	A.g.clamitans	A.clamitans (=A.g.clamitans)	A.g.clamitans
115	L25	STR	CR	Hap56 (C)	Citb	Hap11 (C)	Brazil, SC	São Bento do Sul	-26.2955	-49.3506		X		Tissue	~1cm³ of muscle collected from a carcass kept in the collection of the Bugio Project, CEPESBI/FURB, Santa Catarina, with the appropriate authorization from the competent bodies.	A.g.clamitans	A.g.clamitans	A.clamitans (=A.g.clamitans)	A.g.clamitans
116	S70	STR	CR	Hap82 (C)			Brazil, SC	Guaramirim	-26.4762	-48.9452		X		Tissue	~1cm³ of muscle collected from a carcass kept in the collection of the Bugio Project, CEPESBI/FURB, Santa Catarina, with the appropriate authorization from the competent bodies.	A.g.clamitans	A.g.clamitans	A.clamitans (=A.g.clamitans)	A.g.clamitans
117	S66	STR	CR	Hap78 (C)	Citb	Hap11 (C)	Brazil, SC	Papanduva	-26.4987	-50.1714		X		Tissue	~1cm³ of muscle collected from a carcass kept in the collection of the Bugio Project, CEPESBI/FURB, Santa Catarina, with the appropriate authorization from the competent bodies.	A.g.clamitans	A.g.clamitans	A.clamitans (=A.g.clamitans)	A.g.clamitans
118	S55	STR	CR	Hap68 (C)	Citb	Hap11 (C)	Brazil, SC	Massaranduba	-26.6264	-48.9883		X		Tissue	~1cm³ of muscle collected from a carcass kept in the collection of the Bugio Project, CEPESBI/FURB, Santa Catarina, with the appropriate authorization from the competent bodies.	A.g.clamitans	A.g.clamitans	A.clamitans (=A.g.clamitans)	A.g.clamitans
119	S56	STR	CR	Hap69 (C)	Citb	Hap11 (C)	Brazil, SC	Pomerode	-26.7286	-49.1733		X		Tissue	~1cm³ of muscle collected from a carcass kept in the collection of the Bugio Project, CEPESBI/FURB, Santa Catarina, with the appropriate authorization from the competent bodies.	A.g.clamitans	A.g.clamitans	A.clamitans (=A.g.clamitans)	A.g.clamitans
120	S57	STR	CR	Hap70 (C)	Citb	Hap11 (C)	Brazil, SC	Pomerode	-26.7286	-49.1733		X		Tissue	~1cm³ of muscle collected from a carcass kept in the collection of the Bugio Project, CEPESBI/FURB, Santa Catarina, with the appropriate authorization from the competent bodies.	A.g.clamitans	A.g.clamitans	A.clamitans (=A.g.clamitans)	A.g.clamitans
121	S69	STR	CR	Hap81 (C)	Citb	Hap11 (C)	Brazil, SC	Pomerode	-26.7286	-49.1733		X		Tissue	~1cm³ of muscle collected from a carcass kept in the collection of the Bugio Project, CEPESBI/FURB, Santa Catarina, with the appropriate authorization from the competent bodies.	A.g.clamitans	A.g.clamitans	A.clamitans (=A.g.clamitans)	A.g.clamitans
122	S78	STR	CR	Hap86 (C)	Citb	Hap11 (C)	Brazil, SC	Pomerode	-26.7286	-49.1733		X		Tissue	~1cm³ of muscle collected from a carcass kept in the collection of the Bugio Project, CEPESBI/FURB, Santa Catarina, with the appropriate authorization from the competent bodies.	A.g.clamitans	A.g.clamitans	A.clamitans (=A.g.clamitans)	A.g.clamitans
123	S80	STR	CR	Hap87 (C)	Citb	Hap11 (C)	Brazil, SC	Pomerode	-26.7286	-49.1733		X		Tissue	~1cm³ of muscle collected from a carcass kept in the collection of the Bugio Project, CEPESBI/FURB, Santa Catarina, with the appropriate authorization from the competent bodies.	A.g.clamitans	A.g.clamitans	A.clamitans (=A.g.clamitans)	A.g.clamitans
124	S88	STR	CR	Hap82 (C)	Citb	Hap11 (C)	Brazil, SC	Pomerode	-26.7286	-49.1733		X		Tissue	~1cm³ of muscle collected from a carcass kept in the collection of the Bugio Project, CEPESBI/FURB, Santa Catarina, with the appropriate authorization from the competent bodies.	A.g.clamitans	A.g.clamitans	A.clamitans (=A.g.clamitans)	A.g.clamitans
125	S95	STR	CR	Hap73 (C)	Citb	Hap14 (C)	Brazil, SC	Pomerode	-26.7286	-49.1733		X		Tissue	~1cm³ of muscle collected from a carcass kept in the collection of the Bugio Project, CEPESBI/FURB, Santa Catarina, with the appropriate authorization from the competent bodies.	A.g.clamitans	A.g.clamitans	A.clamitans (=A.g.clamitans)	A.g.clamitans
126	S108	STR	CR	Hap100 (C)	Citb	Hap11 (C)	Brazil, SC	Pomerode	-26.7286	-49.1733		X		Tissue	~1cm³ of muscle collected from a carcass kept in the collection of the Bugio Project, CEPESBI/FURB, Santa Catarina, with the appropriate authorization from the competent bodies.	A.g.clamitans	A.g.clamitans	A.clamitans (=A.g.clamitans)	A.g.clamitans
127	L23	STR					Brazil, SC	Pomerode	-26.7286	-49.1733		X		Tissue	~1cm³ of muscle collected from a carcass kept in the collection of the Bugio Project, CEPESBI/FURB, Santa Catarina, with the appropriate authorization from the competent bodies.	A.g.clamitans	A.g.clamitans	A.clamitans (=A.g.clamitans)	A.g.clamitans
128	S72	STR	CR	Hap73 (C)	Citb	Hap14 (C)	Brazil, SC	Vila Itoupava, Blumenau	-26.7291	-49.0606	X			Feces	Feces sample collected during fieldwork.	A.g.clamitans	A.g.clamitans	A.clamitans (=A.g.clamitans)	A.g.clamitans
129	S73	STR	CR	Hap83 (C)	Citb	Hap11 (C)	Brazil, SC	Vila Itoupava, Blumenau	-26.7291	-49.0606	X			Feces	Feces sample collected during fieldwork.	A.g.clamitans	A.g.clamitans	A.clamitans (=A.g.clamitans)	A.g.clamitans
130	S91	STR	CR	Hap91 (C)	Citb	Hap11 (C)	Brazil, SC	Vila Itoupava, Blumenau	-26.7291	-49.0606	X			Feces	Feces sample collected during fieldwork.	A.g.clamitans	A.g.clamitans	A.clamitans (=A.g.clamitans)	A.g.clamitans
131	S85	STR	CR	Hap90 (C)			Brazil, SC	Itoupavazinha, Blumenau	-26.8469	-49.1098	X			Feces	Feces sample collected during fieldwork.	A.g.clamitans	A.g.clamitans	A.clamitans (=A.g.clamitans)	A.g.clamitans
132	S86	STR	CR	Hap86 (C)	Citb	Hap11 (C)	Brazil, SC	Itoupavazinha, Blumenau	-26.8469	-49.1098	X			Feces	Feces sample collected during fieldwork.	A.g.clamitans	A.g.clamitans	A.clamitans (=A.g.clamitans)	A.g.clamitans
133	S52	STR	CR	Hap65 (C)	Citb	Hap11 (C)	Brazil, SC	Blumenau	-26.885	-49.097		X		Tissue	~1cm³ of muscle collected from a carcass kept in the collection of the Bugio Project, CEPESBI/FURB, Santa Catarina, with the appropriate authorization from the competent bodies.	A.g.clamitans	A.g.clamitans	A.clamitans (=A.g.clamitans)	A.g.clamitans
134	S60	STR	CR	Hap73 (C)	Citb	Hap14 (C)	Brazil, SC	Blumenau	-26.885	-49.097		X		Tissue	~1cm³ of muscle collected from a carcass kept in the collection of the Bugio Project, CEPESBI/FURB, Santa Catarina, with the appropriate authorization from the competent bodies.	A.g.clamitans	A.g.clamitans	A.clamitans (=A.g.clamitans)	A.g.clamitans
135	S77	STR	CR	Hap85 (C)	Citb	Hap11 (C)	Brazil, SC	Blumenau	-26.885	-49.097		X		Tissue	~1cm³ of muscle collected from a carcass kept in the collection of the Bugio Project, CEPESBI/FURB, Santa Catarina, with the appropriate authorization from the competent bodies.	A.g.clamitans	A.g.clamitans	A.clamitans (=A.g.clamitans)	A.g.clamitans
136	S92	STR	CR	Hap92 (C)	Citb	Hap11 (C)	Brazil, SC	Blumenau	-26.885	-49.097		X		Tissue	~1cm³ of muscle collected from a carcass kept in the collection of the Bugio Project, CEPESBI/FURB, Santa Catarina, with the appropriate authorization from the competent bodies.	A.g.clamitans	A.g.clamitans	A.clamitans (=A.g.clamitans)	A.g.clamitans
137	S97	STR	CR	Hap83 (C)	Citb	Hap11 (C)	Brazil, SC	Blumenau	-26.885	-49.097		X		Tissue	~1cm³ of muscle collected from a carcass kept in the collection of the Bugio Project, CEPESBI/FURB, Santa Catarina, with the appropriate authorization from the competent bodies.	A.g.clamitans	A.g.clamitans	A.clamitans (=A.g.clamitans)	A.g.clamitans
138	S106	STR	CR	Hap67 (C)	Citb	Hap11 (C)	Brazil, SC	Blumenau	-26.885	-49.097		X		Tissue	~1cm³ of muscle collected from a carcass kept in the collection of the Bugio Project, CEPESBI/FURB, Santa Catarina, with the appropriate authorization from the competent bodies.	A.g.clamitans	A.g.clamitans	A.clamitans (=A.g.clamitans)	A.g.clamitans
139	S99	STR	CR	Hap95 (C)	Citb	Hap16 (C)	Brazil, SC	Morro Geisler, Indaial	-26.8982	-49.2213	X			Feces	Feces sample collected during fieldwork.	A.g.clamitans	A.g.clamitans	A.clamitans (=A.g.clamitans)	A.g.clamitans
140	S109	STR	CR	Hap101 (C)			Brazil, SC	Morro Geisler, Indaial	-26.8982	-49.2213	X			Feces	Feces sample collected during fieldwork.	A.g.clamitans	A.g.clamitans	A.clamitans (=A.g.clamitans)	A.g.clamitans
141	L28	STR	CR	Hap50 (C)			Brazil, SC	Morro Geisler, Indaial	-26.8982	-49.2213	X			Tissue	~1cm³ of muscle collected from a carcass kept in the collection of the Bugio Project, CEPESBI/FURB, Santa Catarina, with the appropriate authorization from the competent bodies.	A.g.clamitans	A.g.clamitans	A.clamitans (=A.g.clamitans)	A.g.clamitans
142	L29	STR	CR	Hap50 (C)	Citb	Hap11 (C)	Brazil, SC	Morro Geisler, Indaial	-26.8982	-49.2213	X			Tissue	~1cm³ of muscle collected from a carcass kept in the collection of the Bugio Project, CEPESBI/FURB, Santa Catarina, with the appropriate authorization from the competent bodies.	A.g.clamitans	A.g.clamitans	A.clamitans (=A.g.clamitans)	A.g.clamitans
143	L30	STR	CR	Hap57 (C)	Citb	Hap11 (C)	Brazil, SC	Morro Geisler, Indaial	-26.8982	-49.2213	X			Tissue	~1cm³ of muscle collected from a carcass kept in the collection of the Bugio Project, CEPESBI/FURB, Santa Catarina, with the appropriate authorization from the competent bodies.	A.g.clamitans	A.g.clamitans	A.clamitans (=A.g.clamitans)	A.g.clamitans
144	S75	STR	CR	Hap50 (C)	Citb	Hap11 (C)	Brazil, SC	Encano Baixo, Indaial	-26.8983	-49.1646	X			Feces	Feces sample collected during fieldwork.	A.g.clamitans	A.g.clamitans	A.clamitans (=A.g.clamitans)	A.g.clamitans
145	S51	STR	CR	Hap64 (C)	Citb	Hap11 (C)	Brazil, SC	Indaial	-26.9944	-49.2241		X		Tissue	~1cm³ of muscle collected from a carcass kept in the collection of the Bugio Project, CEPESBI/FURB, Santa Catarina, with the appropriate authorization from the competent bodies.	A.g.clamitans	A.g.clamitans	A.clamitans (=A.g.clamitans)	A.g.clamitans
146	S94	STR	CR	Hap49 (C)	Citb	Hap11 (C)	Brazil, SC	Indaial	-26.9944	-49.2241		X		Tissue	~1cm³ of muscle collected from a carcass kept in the collection of the Bugio Project, CEPESBI/FURB, Santa Catarina, with the appropriate authorization from the competent bodies.	A.g.clamitans	A.g.clamitans	A.clamitans (=A.g.clamitans)	A.g.clamitans
147	S103	STR	CR	Hap98 (C)	Citb	Hap11 (C)	Brazil, SC	Indaial	-26.9944	-49.2241		X		Tissue	~1cm³ of muscle collected from a carcass kept in the collection of the Bugio Project, CEPESBI/FURB, Santa Catarina, with the appropriate authorization from the competent bodies.	A.g.clamitans	A.g.clamitans	A.clamitans (=A.g.clamitans)	A.g.clamitans
148	S104	STR	CR	Hap68 (C)	Citb	Hap11 (C)	Brazil, SC	Indaial	-26.9944	-49.2241		X		Tissue	~1cm³ of muscle collected from a carcass kept in the collection of the Bugio Project, CEPESBI/FURB, Santa Catarina, with the appropriate authorization from the competent bodies.	A.g.clamitans	A.g.clamitans	A.clamitans (=A.g.clamitans)	A.g.clamitans
149	S105	STR	CR	Hap73 (C)	Citb	Hap14 (C)	Brazil, SC	Indaial	-26.9944	-49.2241		X		Tissue	~1cm³ of muscle collected from a carcass kept in the collection of the Bugio Project, CEPESBI/FURB, Santa Catarina, with the appropriate authorization from the competent bodies.	A.g.clamitans	A.g.clamitans	A.clamitans (=A.g.clamitans)	A.g.clamitans
150	L26	STR	CR	Hap49 (C)	Citb	Hap11 (C)	Brazil, SC	Indaial	-26.9944	-49.2241		X		Tissue	~1cm³ of muscle collected from a carcass kept in the collection of the Bugio Project, CEPESBI/FURB, Santa Catarina, with the appropriate authorization from the competent bodies.	A.g.clamitans	A.g.clamitans	A.clamitans (=A.g.clamitans)	A.g.clamitans
151	S83	STR	CR	Hap89 (C)	Citb	Hap11 (C)	Brazil, SC	Gaspar	-26.931	-48.9658		X		Tissue	~1cm³ of muscle collected from a carcass kept in the collection of the Bugio Project, CEPESBI/FURB, Santa Catarina, with the appropriate authorization from the competent bodies.	A.g.clamitans	A.g.clamitans	A.clamitans (=A.g.clamitans)	A.g.clamitans
152	S50	STR	CR	hap63 (C)	Citb	Hap11 (C)	Brazil, SC	Ascurra	-26.9734	-49.3956		X		Tissue	~1cm³ of muscle collected from a carcass kept in the collection of the Bugio Project, CEPESBI/FURB, Santa Catarina, with the appropriate authorization from the competent bodies.	A.g.clamitans	A.g.clamitans	A.clamitans (=A.g.clamitans)	A.g.clamitans
153	S61	STR	CR	Hap74 (C)	Citb	Hap4 (C)	Brazil, SC	Ascurra	-26.9734	-49.3956		X		Tissue	~1cm³ of muscle collected from a carcass kept in the collection of the Bugio Project, CEPESBI/FURB, Santa Catarina, with the appropriate authorization from the competent bodies.	A.g.clamitans	A.g.clamitans	A.clamitans (=A.g.clamitans)	A.g.clamitans
154	L27	STR					Brazil, SC	Taio	-27.0787	-50.0927		X		Tissue	~1cm³ of muscle collected from a carcass kept in the collection of the Bugio Project, CEPESBI/FURB, Santa Catarina, with the appropriate authorization from the competent bodies.	A.g.clamitans	A.g.clamitans	A.clamitans (=A.g.clamitans)	A.g.clamitans
155	S62	STR	CR	Hap75 (C)	Citb	Hap11 (C)	Brazil, SC	Brusque	-27.1247	-48.9097		X		Tissue	~1cm³ of muscle collected from a carcass kept in the collection of the Bugio Project, CEPESBI/FURB, Santa Catarina, with the appropriate authorization from the competent bodies.	A.g.clamitans	A.g.clamitans	A.clamitans (=A.g.clamitans)	A.g.clamitans
156	S81	STR	CR	Hap88 (C)	Citb	Hap11 (C)	Brazil, SC	Florianópolis	-27.5779	-48.5082		X		Tissue	~1cm³ of muscle collected from a carcass kept in the collection of the Bugio Project, CEPESBI/FURB, Santa Catarina, with the appropriate authorization from the competent bodies.	A.g.clamitans	A.g.clamitans	A.clamitans (=A.g.clamitans)	A.g.clamitans
157	S102	STR	CR	Hap97 (C)	Citb	Hap11 (C)	Brazil, SC	Florianópolis	-27.5779	-48.5082		X		Tissue	~1cm³ of muscle collected from a carcass kept in the collection of the Bugio Project, CEPESBI/FURB, Santa Catarina, with the appropriate authorization from the competent bodies.	A.g.clamitans	A.g.clamitans	A.clamitans (=A.g.clamitans)	A.g.clamitans
158	S54	STR	CR	Hap67 (C)	Citb	Hap11 (C)	Brazil, SC	São Bonifácio	-27.9562	-48.9399		X		Tissue	~1cm³ of muscle collected from a carcass kept in the collection of the Bugio Project, CEPESBI/FURB, Santa Catarina, with the appropriate authorization from the competent bodies.	A.g.clamitans	A.g.clamitans	A.clamitans (=A.g.clamitans)	A.g.clamitans
159	S65	STR	CR	Hap77 (C)	Citb	Hap11 (C)	Brazil, SC	Lages	-28.0201	-50.3409		X		Tissue	~1cm³ of muscle collected from a carcass kept in the collection of the Bugio Project, CEPESBI/FURB, Santa Catarina, with the appropriate authorization from the competent bodies.	A.g.clamitans	A.g.clamitans	A.clamitans (=A.g.clamitans)	A.g.clamitans
160	S87	STR			Citb	Hap11 (C)	Brazil, SC	Lages	-28.0201	-50.3409		X		Tissue	~1cm³ of muscle collected from a carcass kept in the collection of the Bugio Project, CEPESBI/FURB, Santa Catarina, with the appropriate authorization from the competent bodies.	A.g.clamitans	A.g.clamitans	A.clamitans (=A.g.clamitans)	A.g.clamitans
161	S68	STR	CR	Hap80 (C)	Citb	Hap11 (C)	Brazil, SC	Braço do Norte	-28.2409	-49.1428		X		Tissue	~1cm³ of muscle collected from a carcass kept in the collection of the Bugio Project, CEPESBI/FURB, Santa Catarina, with the appropriate authorization from the competent bodies.	A.g.clamitans	A.g.clamitans	A.clamitans (=A.g.clamitans)	A.g.clamitans
162	S59	STR	CR	Hap72 (C)	Citb	Hap11 (C)	Brazil, SC	Laguna	-28.486	-48.826		X		Tissue	~1cm³ of muscle collected from a carcass kept in the collection of the Bugio Project, CEPESBI/FURB, Santa Catarina, with the appropriate authorization from the competent bodies.	A.g.clamitans	A.g.clamitans	A.clamitans (=A.g.clamitans)	A.g.clamitans
163	S64	STR	CR	Hap76 (C)	Citb	Hap11 (C)	Brazil, SC	Laguna	-28.486	-48.826		X		Tissue	~1cm³ of muscle collected from a carcass kept in the collection of the Bugio Project, CEPESBI/FURB, Santa Catarina, with the appropriate authorization from the competent bodies.	A.g.clamitans	A.g.clamitans	A.clamitans (=A.g.clamitans)	A.g.clamitans
164	S96	STR	CR	Hap94 (C)	Citb	Hap11 (C)	Brazil, SC	Laguna	-28.486	-48.826		X		Tissue	~1cm³ of muscle collected from a carcass kept in the collection of the Bugio Project, CEPESBI/FURB, Santa Catarina, with the appropriate authorization from the competent bodies.	A.g.clamitans	A.g.clamitans	A.clamitans (=A.g.clamitans)	A.g.clamitans
165	S53	STR	CR	Hap66 (C)	Citb	Hap11 (C)	Brazil, SC		-27.2435	-50.4992			X	Tissue	~1cm³ of muscle collected from a carcass kept in the collection of the Bugio Project, CEPESBI/FURB, Santa Catarina, with the appropriate authorization from the competent bodies.	A.g.clamitans	A.g.clamitans	A.clamitans (=A.g.clamitans)	A.g.clamitans
166	S93	STR	CR	Hap93 (C)	Citb	Hap11 (C)	Brazil, SC		-27.2435	-50.4992			X	Tissue	~1cm³ of muscle collected from a carcass kept in the collection of the Bugio Project, CEPESBI/FURB, Santa Catarina, with the appropriate authorization from the competent bodies.	A.g.clamitans	A.g.clamitans	A.clamitans (=A.g.clamitans)	A.g.clamitans
167	S98	STR	CR	Hap83 (C)	Citb	Hap11 (C)	Brazil, SC		-27.2435	-50.4992			X	Tissue	~1cm³ of muscle collected from a carcass kept in the collection of the Bugio Project, CEPESBI/FURB, Santa Catarina, with the appropriate authorization from the competent bodies.	A.g.clamitans	A.g.clamitans	A.clamitans (=A.g.clamitans)	A.g.clamitans
168	S100	STR	CR	Hap96 (C)			Brazil, SC		-27.2435	-50.4992			X	Tissue	~1cm³ of muscle collected from a carcass kept in the collection of the Bugio Project, CEPESBI/FURB, Santa Catarina, with the appropriate authorization from the competent bodies.	A.g.clamitans	A.g.clamitans	A.clamitans (=A.g.clamitans)	A.g.clamitans
169	S101	STR	CR	Hap86 (C)	Citb	Hap11 (C)	Brazil, SC		-27.2435	-50.4992			X	Tissue	~1cm³ of muscle collected from a carcass kept in the collection of the Bugio Project, CEPESBI/FURB, Santa Catarina, with the appropriate authorization from the competent bodies.	A.g.clamitans	A.g.clamitans	A.clamitans (=A.g.clamitans)	A.g.clamitans
170	S107	STR	CR	Hap99 (C)	Citb	Hap11 (C)	Brazil, SC		-27.2435	-50.4992			X	Tissue	~1cm³ of muscle collected from a carcass kept in the collection of the Bugio Project, CEPESBI/FURB, Santa Catarina, with the appropriate authorization from the competent bodies.	A.g.clamitans	A.g.clamitans	A.clamitans (=A.g.clamitans)	A.g.clamitans
171	S110	STR	CR	Hap57 (C)	Citb	Hap11 (C)	Brazil, SC		-27.2435	-50.4992			X	Tissue	~1cm³ of muscle collected from a carcass kept in the collection of the Bugio Project, CEPESBI/FURB, Santa Catarina, with the appropriate authorization from the competent bodies.	A.g.clamitans	A.g.clamitans	A.clamitans (=A.g.clamitans)	A.g.clamitans
172	L6	STR					Brazil, RS	Canela	-29.3519	-50.7749		X		Blood	500ul-1ml of whole blood collected from an individual kept at the Sapucaia Zoo, Rio Grande do Sul, during routine care procedures at this institution, conducted under the technical responsibility of the Zoo's qualified team, including a veterinary doctor, duly authorized by the competent bodies for the supervision of ex situ keeping institutions.	A.g.clamitans	A.g.clamitans	A.clamitans (=A.g.clamitans)	A.g.clamitans
173	46*		CR	Hap108 (C)			Brazil, RS	Balneário, Jaguari	-29.4935	-54.6899	X			Feces	Feces sample collected during fieldwork.	A.g.clamitans	A.g.clamitans	A.clamitans (=A.g.clamitans)	A.g.clamitans
174	57 ZC?		CR	Hap108 (C)			Brazil, RS	Balneário, Jaguari	-29.4935	-54.6899	X			Feces	Feces sample collected during fieldwork.	A.g.clamitans	A.g.clamitans	A.clamitans (=A.g.clamitans)	A.g.clamitans
175	58 ZC?		CR	Hap109 (C)			Brazil, RS	Balneário, Jaguari	-29.4935	-54.6899	X			Feces	Feces sample collected during fieldwork.	A.g.clamitans	A.g.clamitans	A.clamitans (=A.g.clamitans)	A.g.clamitans
176	59 ZC?		CR	Hap108 (C)			Brazil, RS	Balneário, Jaguari	-29.4935	-54.6899	X			Feces	Feces sample collected during fieldwork.	A.g.clamitans	A.g.clamitans	A.clamitans (=A.g.clamitans)	A.g.clamitans
177	60 ZC?		CR	Hap109 (C)			Brazil, RS	Balneário, Jaguari	-29.4935	-54.6899	X			Feces	Feces sample collected during fieldwork.	A.g.clamitans	A.g.clamitans	A.clamitans (=A.g.clamitans)	A.g.clamitans
178	56*		CR	Hap108 (C)			Brazil, RS	Perseverança, São Francisco de Assis	-29.4701	-55.045	X			Feces	Feces sample collected during fieldwork.	A.g.clamitans	A.g.clamitans	A.clamitans (=A.g.clamitans)	A.g.clamitans
179	1*		CR	Hap108 (C)			Brazil, RS	Reserva, São Francisco de Assis	-29.5277	-55.0002	X			Feces	Feces sample collected during fieldwork.	A.g.clamitans	A.g.clamitans	A.clamitans (=A.g.clamitans)	A.g.clamitans
180	19*		CR	Hap108 (C)			Brazil, RS	Reserva, São Francisco de Assis	-29.5277	-55.0002	X			Feces	Feces sample collected during fieldwork.	A.g.clamitans	A.g.clamitans	A.clamitans (=A.g.clamitans)	A.g.clamitans
181	8*		CR	Hap109 (C)			Brazil, RS	Cerro Negro, São Francisco de Assis	-29.6135	-54.9706	X			Feces	Feces sample collected during fieldwork.	A.g.clamitans	A.g.clamitans	A.clamitans (=A.g.clamitans)	A.g.clamitans
182	9*		CR	Hap109 (C)			Brazil, RS	Cerro Negro, São Francisco de Assis	-29.6146	-54.9705	X			Feces	Feces sample collected during fieldwork.	A.g.clamitans	A.g.clamitans	A.clamitans (=A.g.clamitans)	A.g.clamitans
183	13*		CR	Hap109 (C)			Brazil, RS	Cerro Negro, São Francisco de Assis	-29.6146	-54.9705	X			Feces	Feces sample collected during fieldwork.	A.g.clamitans	A.g.clamitans	A.clamitans (=A.g.clamitans)	A.g.clamitans
184	2*		CR	Hap116 (C)			Brazil, RS	Jacaquá, São Francisco de Assis	-29.6641	-55.1661	X			Feces	Feces sample collected during fieldwork.	A.g.clamitans	A.g.clamitans	A.clamitans (=A.g.clamitans)	A.g.clamitans
185	G10/23*		CR	Hap109 (C)			Brazil, RS	Cerro Loreto, São Vicente do Sul	-29.6945	-54.9075	X			Feces	Feces sample collected during fieldwork.	A.g.clamitans	A.g.clamitans	A.clamitans (=A.g.clamitans)	A.g.clamitans
186	G10/24*		CR	Hap109 (C)			Brazil, RS	Cerro Loreto, São Vicente do Sul	-29.6945	-54.9075	X			Feces	Feces sample collected during fieldwork.	A.g.clamitans	A.g.clamitans	A.clamitans (=A.g.clamitans)	A.g.clamitans
187	G6/12*	STR	CR	Hap109 (C)			Brazil, RS	Cerro Loreto, São Vicente do Sul	-29.7	-54.8987	X			Feces	Feces sample collected during fieldwork.	A.g.clamitans	A.g.clamitans	A.clamitans (=A.g.clamitans)	A.g.clamitans
188	G4/06*	STR	CR	Hap109 (C)			Brazil, RS	Cerro Loreto, São Vicente do Sul	-29.7106	-54.9018	X			Feces	Feces sample collected during fieldwork.	A.g.clamitans	A.g.clamitans	A.clamitans (=A.g.clamitans)	A.g.clamitans
189	G4/07*	STR	CR	Hap109 (C)			Brazil, RS	Cerro Loreto, São Vicente do Sul	-29.7106	-54.9018	X			Feces	Feces sample collected during fieldwork.	A.g.clamitans	A.g.clamitans	A.clamitans (=A.g.clamitans)	A.g.clamitans
190	G4/08*	STR	CR	Hap109 (C)			Brazil, RS	Cerro Loreto, São Vicente do Sul	-29.7106	-54.9018	X			Feces	Feces sample collected during fieldwork.	A.g.clamitans	A.g.clamitans	A.clamitans (=A.g.clamitans)	A.g.clamitans
191	G4/09*	STR	CR	Hap109 (C)			Brazil, RS	Cerro Loreto, São Vicente do Sul	-29.7106	-54.9018	X			Feces	Feces sample collected during fieldwork.	A.g.clamitans	A.g.clamitans	A.clamitans (=A.g.clamitans)	A.g.clamitans
192	G13/30*		CR	Hap112 (C)			Brazil, RS	Cerro Agudo, São Vicente do Sul	-29.7122	-54.903	X			Feces	Feces sample collected during fieldwork.	A.g.clamitans	A.g.clamitans	A.clamitans (=A.g.clamitans)	A.g.clamitans
193	G13/31*		CR	Hap112 (C)			Brazil, RS	Cerro Agudo, São Vicente do Sul	-29.7122	-54.903	X			Feces	Feces sample collected during fieldwork.	A.g.clamitans	A.g.clamitans	A.clamitans (=A.g.clamitans)	A.g.clamitans
194	G8/16*		CR	Hap109 (C)			Brazil, RS	Cerro Loreto, São Vicente do Sul	-29.7141	-54.8996	X			Feces	Feces sample collected during fieldwork.	A.g.clamitans	A.g.clamitans	A.clamitans (=A.g.clamitans)	A.g.clamitans
195	G8/17*		CR	Hap109 (C)			Brazil, RS	Cerro Loreto, São Vicente do Sul	-29.7141	-54.8996	X			Feces	Feces sample collected during fieldwork.	A.g.clamitans	A.g.clamitans	A.clamitans (=A.g.clamitans)	A.g.clamitans
196	G8/18*		CR	Hap109 (C)			Brazil, RS	Cerro Loreto, São Vicente do Sul	-29.7141	-54.8996	X			Feces	Feces sample collected during fieldwork.	A.g.clamitans	A.g.clamitans	A.clamitans (=A.g.clamitans)	A.g.clamitans
197	G5/10*		CR	Hap109 (C)			Brazil, RS	Cerro Loreto, São Vicente do Sul	-29.7183	-54.8995	X			Feces	Feces sample collected during fieldwork.	A.g.clamitans	A.g.clamitans	A.clamitans (=A.g.clamitans)	A.g.clamitans
198	122		CR				Brazil, RS	Gravatá 2, Santa Maria	-29.7357	-53.8288	X			Feces	Feces sample collected during fieldwork.	A.g.clamitans	A.g.clamitans	A.clamitans (=A.g.clamitans)	A.g.clamitans
199	126		short				Brazil, RS	Gravatá 2, Santa Maria	-29.7357	-53.8288	X			Feces	Feces sample collected during fieldwork.	A.g.clamitans	A.g.clamitans	A.clamitans (=A.g.clamitans)	A.g.clamitans
200	114		CR	Hap115 (C)			Brazil, RS	Sede, Santa Maria	-29.7383	-53.843	X			Feces	Feces sample collected during fieldwork.	A.g.clamitans	A.g.clamitans	A.clamitans (=A.g.clamitans)	A.g.clamitans
201	128		CR	Hap114 (C)			Brazil, RS	Capão da Infantaria, Santa Maria	-29.7575	-53.8773	X			Feces	Feces sample collected during fieldwork.	A.g.clamitans	A.g.clamitans	A.clamitans (=A.g.clamitans)	A.g.clamitans
202	130		CR	Hap114 (C)			Brazil, RS	Capão da Infantaria, Santa Maria	-29.7575	-53.8773	X			Feces	Feces sample collected during fieldwork.	A.g.clamitans	A.g.clamitans	A.clamitans (=A.g.clamitans)	A.g.clamitans
203	131		CR	Hap111 (C)			Brazil, RS	Capão da Infantaria, Santa Maria	-29.7575	-53.8773	X			Feces	Feces sample collected during fieldwork.	A.g.clamitans	A.g.clamitans	A.clamitans (=A.g.clamitans)	A.g.clamitans
204	133		CR	Hap110 (C)			Brazil, RS	Piquenique, Santa Maria	-29.7789	-53.8304	X			Feces	Feces sample collected during fieldwork.	A.g.clamitans	A.g.clamitans	A.clamitans (=A.g.clamitans)	A.g.clamitans
205	135		CR	Hap113 (C)			Brazil, RS	Piquenique, Santa Maria	-29.7789	-53.8304	X			Feces	Feces sample collected during fieldwork.	A.g.clamitans	A.g.clamitans	A.clamitans (=A.g.clamitans)	A.g.clamitans
206	137		CR	Hap113 (C)			Brazil, RS	Piquenique, Santa Maria	-29.7789	-53.8304	X			Feces	Feces sample collected during fieldwork.	A.g.clamitans	A.g.clamitans	A.clamitans (=A.g.clamitans)	A.g.clamitans
207	L40	STR	CR	Hap59 (C)	Citb	Hap11 (C)	Brazil, RS	São Leopoldo	-29.7554	-51.145		X		Tissue	~1cm³ of muscle collected from the carcass of an individual found dead after being run over. Brazilian legislation establishes that the collection of samples of biological material in these conditions and outside protected areas does not require collection permits.	A.g.clamitans	A.g.clamitans	A.clamitans (=A.g.clamitans)	A.g.clamitans
208	L33	STR					Brazil, RS	Esteio	-29.8517	-51.1768		X		Tissue	~1cm³ of muscle collected from the carcass of an individual found dead after being run over. Brazilian legislation establishes that the collection of samples of biological material in these conditions and outside protected areas does not require collection permits.	A.g.clamitans	A.g.clamitans	A.clamitans (=A.g.clamitans)	A.g.clamitans
209	L20	STR	CR	Hap48 (C)			Brazil, RS	RS290/km161, Butiá	-30.1328	-51.9383	X			Tissue	~1cm³ of muscle collected from the carcass of an individual found dead after being run over. Brazilian legislation establishes that the collection of samples of biological material in these conditions and outside protected areas does not require collection permits.	A.g.clamitans	A.g.clamitans	A.clamitans (=A.g.clamitans)	A.g.clamitans
210	L2	STR	CR	Hap48 (C)			Brazil, RS	Arroio dos Ratos	-30.1932	-51.7519		X		Tissue	~1cm³ of muscle collected from the carcass of an individual found dead after being run over. Brazilian legislation establishes that the collection of samples of biological material in these conditions and outside protected areas does not require collection permits.	A.g.clamitans	A.g.clamitans	A.clamitans (=A.g.clamitans)	A.g.clamitans
211	L46	STR	CR				Brazil, RS	Morro Extrema, Porto Alegre	-30.2005	-51.0754	X			Tissue	~1cm³ of muscle collected from the carcass of an individual found dead during fieldwork, and it was not possible to determine the cause of death. Brazilian legislation establishes that the collection of samples of biological material in these conditions and outside protected areas does not require collection permits.	A.g.clamitans	A.g.clamitans	A.clamitans (=A.g.clamitans)	A.g.clamitans
212	Rabo	STR	CR	Hap51 (C)	Citb	Hap11 (C)	Brazil, RS	Lami, Porto Alegre	-30.2481	-51.0678	X			Tissue	~1cm³ of muscle collected from the carcass of an individual found dead during fieldwork, and it was not possible to determine the cause of death. Brazilian legislation establishes that the collection of samples of biological material in these conditions and outside protected areas does not require collection permits.	A.g.clamitans	A.g.clamitans	A.clamitans (=A.g.clamitans)	A.g.clamitans
213	Bede	STR	CR	Hap106 (C)			Brazil, RS	Lami, Porto Alegre	-30.2481	-51.0678	X			Tissue	~1cm³ of muscle collected from the carcass of an individual found dead during fieldwork, and it was not possible to determine the cause of death. Brazilian legislation establishes that the collection of samples of biological material in these conditions and outside protected areas does not require collection permits.	A.g.clamitans	A.g.clamitans	A.clamitans (=A.g.clamitans)	A.g.clamitans
214	L8	STR					Brazil, RS	Lami, Porto Alegre	-30.2481	-51.0678	X			Tissue	~1cm³ of muscle collected from the carcass of an individual found dead after electrocution on electricity transmission lines. Brazilian legislation establishes that the collection of samples of biological material in these conditions and outside protected areas does not require collection permits.	A.g.clamitans	A.g.clamitans	A.clamitans (=A.g.clamitans)	A.g.clamitans
215	L15	STR					Brazil, RS	Lami, Porto Alegre	-30.2481	-51.0678	X			Tissue	~1cm³ of muscle collected from the carcass of an individual found dead after a severe fight with her social group as reported by local people. Brazilian legislation establishes that the collection of samples of biological material in these conditions and outside protected areas does not require collection permits.	A.g.clamitans	A.g.clamitans	A.clamitans (=A.g.clamitans)	A.g.clamitans
216	L35	STR	CR	Hap58 (C)			Brazil, RS	Lami, Porto Alegre	-30.2481	-51.0678	X			Tissue	~1cm³ of muscle collected from the carcass of an individual found dead after being run over. Brazilian legislation establishes that the collection of samples of biological material in these conditions and outside protected areas does not require collection permits.	A.g.clamitans	A.g.clamitans	A.clamitans (=A.g.clamitans)	A.g.clamitans
217	L44	STR	CR	Hap62 (C)			Brazil, RS	Lami, Porto Alegre	-30.2481	-51.0678	X			Tissue	~1cm³ of muscle collected from the carcass of an individual found dead during the fieldwork, which was later necropsied, with superparasite identified as the cause of death. Brazilian legislation establishes that the collection of samples of biological material in these conditions and outside protected areas does not require collection permits.	A.g.clamitans	A.g.clamitans	A.clamitans (=A.g.clamitans)	A.g.clamitans
218	L45	STR	CR	Hap62 (C)			Brazil, RS	Lami, Porto Alegre	-30.2481	-51.0678	X			Tissue	~1cm³ of muscle collected from the carcass of an individual found dead during the fieldwork, which was later necropsied, with superparasite identified as the cause of death. Brazilian legislation establishes that the collection of samples of biological material in these conditions and outside protected areas does not require collection permits.	A.g.clamitans	A.g.clamitans	A.clamitans (=A.g.clamitans)	A.g.clamitans
219	Ore	STR					Brazil, RS	Lami, Porto Alegre	-30.2481	-51.0678	X			Tissue	~1cm³ of muscle collected from the carcass of an individual found dead during fieldwork, and it was not possible to determine the cause of death. Brazilian legislation establishes that the collection of samples of biological material in these conditions and outside protected areas does not require collection permits.	A.g.clamitans	A.g.clamitans	A.clamitans (=A.g.clamitans)	A.g.clamitans
220	L9	STR	CR	Hap51 (C)			Brazil, RS	Águas Claras, Viamão	-30.1737	-50.882	X			Tissue	~1cm³ of muscle collected from the carcass of an individual found dead after being run over. Brazilian legislation establishes that the collection of samples of biological material in these conditions and outside protected areas does not require collection permits.	A.g.clamitans	A.g.clamitans	A.clamitans (=A.g.clamitans)	A.g.clamitans
221	L37	STR	CR	Hap58 (C)			Brazil, RS	Itapuã (Hosp.Colônia), Viamão	-30.354	-51.0105	X			Tissue	~1cm³ of muscle collected from the carcass of an individual found dead after electrocution on electricity transmission lines. Brazilian legislation establishes that the collection of samples of biological material in these conditions and outside protected areas does not require collection permits.	A.g.clamitans	A.g.clamitans	A.clamitans (=A.g.clamitans)	A.g.clamitans
222	L38	STR	CR	Hap58 (C)			Brazil, RS	Itapuã (Hosp.Colônia), Viamão	-30.354	-51.0105	X			Tissue	~1cm³ of muscle collected from the carcass of an individual found dead after a domestic dog attack. Brazilian legislation establishes that the collection of samples of biological material in these conditions and outside protected areas does not require collection permits.	A.g.clamitans	A.g.clamitans	A.clamitans (=A.g.clamitans)	A.g.clamitans
223	L4	STR	CR	Hap49 (C)	Citb	Hap11 (C)	Brazil, RS	Itapuã, Viamão	-30.3866	-51.0454	X			Tissue	~1cm³ of muscle collected from the carcass of an individual found dead during fieldwork, and it was not possible to determine the cause of death. Brazilian legislation establishes that the collection of samples of biological material in these conditions and outside protected areas does not require collection permits.	A.g.clamitans	A.g.clamitans	A.clamitans (=A.g.clamitans)	A.g.clamitans
224	L5	STR					Brazil, RS	Itapuã, Viamão	-30.3866	-51.0454	X			Tissue	~1cm³ of muscle collected from the carcass of an individual found dead during fieldwork, and it was not possible to determine the cause of death. Brazilian legislation establishes that the collection of samples of biological material in these conditions and outside protected areas does not require collection permits.	A.g.clamitans	A.g.clamitans	A.clamitans (=A.g.clamitans)	A.g.clamitans
225	L11	STR					Brazil, RS	Itapuã, Viamão	-30.3866	-51.0454	X			Tissue	~1cm³ of muscle collected from the carcass of an individual found dead during fieldwork, and it was not possible to determine the cause of death. Brazilian legislation establishes that the collection of samples of biological material in these conditions and outside protected areas does not require collection permits.	A.g.clamitans	A.g.clamitans	A.clamitans (=A.g.clamitans)	A.g.clamitans
226	L31	STR	CR	Hap58 (C)	Citb	Hap13 (C)	Brazil, RS	Itapuã, Viamão	-30.3866	-51.0454	X			Tissue	~1cm³ of muscle collected from the carcass of an individual found dead after a domestic dog attack. Brazilian legislation establishes that the collection of samples of biological material in these conditions and outside protected areas does not require collection permits.	A.g.clamitans	A.g.clamitans	A.clamitans (=A.g.clamitans)	A.g.clamitans
227	L34	STR					Brazil, RS	Itapuã, Viamão	-30.3866	-51.0454	X			Tissue	~1cm³ of muscle collected from the carcass of an individual found dead during fieldwork, and it was not possible to determine the cause of death. Brazilian legislation establishes that the collection of samples of biological material in these conditions and outside protected areas does not require collection permits.	A.g.clamitans	A.g.clamitans	A.clamitans (=A.g.clamitans)	A.g.clamitans
228	L43	STR	CR	Hap61 (C)	Citb	Hap11 (C)	Brazil, RS	Viamão	-30.1671	-50.8695		X		Tissue	~1cm³ of muscle collected from the carcass of an individual found dead after a domestic dog attack. Brazilian legislation establishes that the collection of samples of biological material in these conditions and outside protected areas does not require collection permits.	A.g.clamitans	A.g.clamitans	A.clamitans (=A.g.clamitans)	A.g.clamitans
229	X4=10	STR	CR	Hap103 (C)			Brazil, RS		-29.1687	-52.6724			X	Feces	Feces sample collected during fieldwork in Rio Grande do Sul. Due to a storage problem (alcohol leak), information on the exact collection location was lost.	A.g.clamitans	A.g.clamitans	A.clamitans (=A.g.clamitans)	A.g.clamitans
230	X5=X11	STR	CR	Hap104 (C)	Citb	Hap11 (C)	Brazil, RS		-29.1687	-52.6724			X	Feces	Feces sample collected during fieldwork in Rio Grande do Sul. Due to a storage problem (alcohol leak), information on the exact collection location was lost.	A.g.clamitans	A.g.clamitans	A.clamitans (=A.g.clamitans)	A.g.clamitans
231	X6=X12	STR	CR	Hap58 (C)	Citb	Hap13 (C)	Brazil, RS		-29.1687	-52.6724			X	Feces	Feces sample collected during fieldwork in Rio Grande do Sul. Due to a storage problem (alcohol leak), information on the exact collection location was lost.	A.g.clamitans	A.g.clamitans	A.clamitans (=A.g.clamitans)	A.g.clamitans
232	X7	STR	CR	Hap52 (C)	Citb	Hap11 (C)	Brazil, RS		-29.1687	-52.6724			X	Feces	Feces sample collected during fieldwork in Rio Grande do Sul. Due to a storage problem (alcohol leak), information on the exact collection location was lost.	A.g.clamitans	A.g.clamitans	A.clamitans (=A.g.clamitans)	A.g.clamitans
233	X8	STR	CR	Hap52 (C)			Brazil, RS		-29.1687	-52.6724			X	Feces	Feces sample collected during fieldwork in Rio Grande do Sul. Due to a storage problem (alcohol leak), information on the exact collection location was lost.	A.g.clamitans	A.g.clamitans	A.clamitans (=A.g.clamitans)	A.g.clamitans
234	X9	STR	CR	Hap105 (C)	Citb	Hap17 (C)	Brazil, RS		-29.1687	-52.6724			X	Feces	Feces sample collected during fieldwork in Rio Grande do Sul. Due to a storage problem (alcohol leak), information on the exact collection location was lost.	A.g.clamitans	A.g.clamitans	A.clamitans (=A.g.clamitans)	A.g.clamitans
235	L13	STR	CR	Hap52 (C)			Brazil, RS		-29.1687	-52.6724			X	Tissue	~1cm³ of muscle collected from a carcass kept in the collection of the Sapucaia Zoo, Rio Grande do Sul, with the appropriate authorization from the competent bodies.	A.g.clamitans	A.g.clamitans	A.clamitans (=A.g.clamitans)	A.g.clamitans
236	L32	STR					Brazil, RS		-29.1687	-52.6724			X	Tissue	~1cm³ of muscle collected from a carcass kept in the collection of the Sapucaia Zoo, Rio Grande do Sul, with the appropriate authorization from the competent bodies.	A.g.clamitans	A.g.clamitans	A.clamitans (=A.g.clamitans)	A.g.clamitans
237	L41	STR					Brazil, RS?		-29.1687	-52.6724			X	Tissue	~1cm³ of muscle collected from a carcass kept in the collection of the Sapucaia Zoo, Rio Grande do Sul, with the appropriate authorization from the competent bodies.	A.g.clamitans	A.g.clamitans	A.clamitans (=A.g.clamitans)	A.g.clamitans
238	L42	STR	CR	Hap60 (C)	Citb	Hap11 (C)	Brazil, RS?		-29.1687	-52.6724			X	Tissue	~1cm³ of muscle collected from a carcass kept in the collection of the Sapucaia Zoo, Rio Grande do Sul, with the appropriate authorization from the competent bodies.	A.g.clamitans	A.g.clamitans	A.clamitans (=A.g.clamitans)	A.g.clamitans
239	PG1´	STR	CR	Hap102 (C)			Argentina, Misiones	Parque Provincial Piñalito	-26.5	-53.8333	X			Feces	Feces sample collected during fieldwork.	A.g.clamitans	A.g.clamitans	A.clamitans (=A.g.clamitans)	A.g.clamitans
240	PG3	STR			Citb	Hap11 (C)	Argentina, Misiones	Parque Provincial Piñalito	-26.5	-53.8333	X			Feces	Feces sample collected during fieldwork.	A.g.clamitans	A.g.clamitans	A.clamitans (=A.g.clamitans)	A.g.clamitans
241	PG4	STR					Argentina, Misiones	Parque Provincial Piñalito	-26.5	-53.8333	X			Feces	Feces sample collected during fieldwork.	A.g.clamitans	A.g.clamitans	A.clamitans (=A.g.clamitans)	A.g.clamitans
242	3guariba	STR	CR	Hap102 (C)			Argentina, Misiones	Parque Provincial Piñalito	-26.5	-53.8333	X			Feces	Feces sample collected during fieldwork.	A.g.clamitans	A.g.clamitans	A.clamitans (=A.g.clamitans)	A.g.clamitans
243	2guariba	STR	CR	Hap102 (C)			Argentina, Misiones	Parque Provincial Piñalito	-26.5	-53.8333	X			Feces	Feces sample collected during fieldwork.	A.g.clamitans	A.g.clamitans	A.clamitans (=A.g.clamitans)	A.g.clamitans
		153	220		115	115					172	51	20
			153	with Microsatellite Analisys							172	precisely known origin, collected in the field, and geographic coordinates recorded with GPS equipment or attributed by the location or neighborhood of origin of the individuals, for which we consider a margin of error of up to 10 km.
			220	with CR Analisys							51	eographic coordinates assigned to the centroid of the municipality or protected area of origin, assuming a margin of error of up to 50 km in relation to the precise origin
			116	with CytB Analisys							20	coordinates assigned by the centroid of the species' distribution in the state where the individuals were sampled, and for which the margin of error could be more than 100 km
			(A)	CLADE A (mtDNA)							243	TOTAL
			(B)	CLADE B (mtDNA)
			(C)	CLADE C (mtDNA)

## Sheet: Sampling sites
#	Country, State/Province	Sampling site/municipality	Latitude	Longitude	Number of samples	IUCN	ICMBio/CPB	Gregorin, 2006	Povill et al., 2023
1	Brazil, Bahia	Pouso Alegre	-15.7861	-40.2932	1	A.g.guariba	A.g.guariba	A.clamitans (=A.g.clamitans)	A.g.guariba
2	Minas Gerais, Brazil	Fazenda Santa Rosa, Pedra Azul	-16.0301	-40.9559	7	A.g.guariba	A.g.guariba	A.clamitans (=A.g.clamitans)	A.g.guariba
3	Minas Gerais, Brazil	Jequitinhonha	-16.3481	-41.0597	1	A.g.guariba	A.g.guariba	A.clamitans (=A.g.clamitans)	A.g.guariba
4	Minas Gerais, Brazil	Felisburgo	-16.7933	-40.7971	4	A.g.clamitans	A.g.guariba	A.clamitans (=A.g.clamitans)	A.g.guariba
5	Minas Gerais, Brazil	RPPN Feliciano Miguel Abdala, Caratinga	-19.7232	-41.8063	9	A.g.clamitans	A.g.clamitans	A.clamitans (=A.g.clamitans)	A.g.guariba
6	Espírito Santo, Brazil	Sooretama	-19.1416	-40.0268	3	A.g.clamitans	A.g.guariba	A.fusca (=A.g.guariba)	A.g.guariba
7	Espírito Santo, Brazil	Pancas	-19.2299	-40.8505	7	A.g.clamitans	A.g.guariba	A.fusca (=A.g.guariba)	A.g.guariba
8	Espírito Santo, Brazil	Linhares	-19.4437	-40.0743	2	A.g.clamitans	A.g.clamitans	A.fusca (=A.g.guariba)	A.g.guariba
9	Espírito Santo, Brazil	Santa Maria de Jetibá	-20.0179	-40.7725	7	A.g.clamitans	A.g.clamitans	A.fusca (=A.g.guariba)	A.g.guariba
10	Espírito Santo, Brazil	Floresta Nacional de Pacotuba, Cachoeiro de Itapemirim	-20.7455	-41.2924	11	A.g.clamitans	A.g.clamitans	A.fusca (=A.g.guariba)	A.g.guariba
11	Rio de Janeiro, Brazil	Parque Estadual do Desengano	-21.8235	-41.794	1	A.g.clamitans	A.g.clamitans	A.fusca (=A.g.guariba)	A.g.guariba
12	Rio de Janeiro, Brazil	Rio de Janeiro	-22.9272	-43.3132	2	A.g.clamitans	A.g.clamitans	A.clamitans (=A.g.clamitans)	A.g.guariba
13	Rio de Janeiro, Brazil	Ilha Grande, Angra dos Reis	-23.1304	-44.182	1	A.g.clamitans	A.g.clamitans	A.clamitans (=A.g.clamitans)	A.g.guariba
14	São Paulo, Brazil	Campinas	-22.8698	-46.9407	3	A.g.clamitans	A.g.clamitans	A.clamitans (=A.g.clamitans)	A.g.clamitans
15	São Paulo, Brazil	Mairiporã	-23.2809	-46.5398	5	A.g.clamitans	A.g.clamitans	A.clamitans (=A.g.clamitans)	A.g.guariba
16	São Paulo, Brazil	Serra da Cantareira	-23.4156	-46.6017	19	A.g.clamitans	A.g.clamitans	A.clamitans (=A.g.clamitans)	?
17	São Paulo, Brazil	Horto Florestal, São Paulo	-23.4525	-46.6337	3	A.g.clamitans	A.g.clamitans	A.clamitans (=A.g.clamitans)	?
18	São Paulo, Brazil	Bairro Santo Amaro, São Paulo	-23.6491	-46.6923	1	A.g.clamitans	A.g.clamitans	A.clamitans (=A.g.clamitans)	?
19	São Paulo, Brazil	Itapetininga	-23.651	-48.2246	1	A.g.clamitans	A.g.clamitans	A.clamitans (=A.g.clamitans)	?
20	São Paulo, Brazil	Parque Estadual das Fontes do Ipiranga, São Paulo	-23.6708	-46.6289	4	A.g.clamitans	A.g.clamitans	A.clamitans (=A.g.clamitans)	?
21	São Paulo, Brazil	Jardim Varginha, São Paulo	-23.7899	-46.6867	1	A.g.clamitans	A.g.clamitans	A.clamitans (=A.g.clamitans)	?
22	São Paulo, Brazil	Parelheiro	-23.8318	-46.7325	4	A.g.clamitans	A.g.clamitans	A.clamitans (=A.g.clamitans)	?
23	São Paulo, Brazil	Embu-Guaçu	-23.8984	-46.8362	1	A.g.clamitans	A.g.clamitans	A.clamitans (=A.g.clamitans)	?
24	São Paulo, Brazil	Ibiúna	-23.9107	-47.2694	1	A.g.clamitans	A.g.clamitans	A.clamitans (=A.g.clamitans)	?
25	Paraná, Brazil	Mata do Bugio/Alto Paraiso	-23.3803	-53.7675	9	A.g.clamitans	A.g.clamitans	A.clamitans (=A.g.clamitans)	A.g.clamitans
26	Santa Catarina, Brazil	Joinville	-26.2442	-48.9514	1	A.g.clamitans	A.g.clamitans	A.clamitans (=A.g.clamitans)	A.g.clamitans
27	Santa Catarina, Brazil	São Bento do Sul	-26.2955	-49.3506	3	A.g.clamitans	A.g.clamitans	A.clamitans (=A.g.clamitans)	A.g.clamitans
28	Santa Catarina, Brazil	Guaramirim	-26.4762	-48.9452	1	A.g.clamitans	A.g.clamitans	A.clamitans (=A.g.clamitans)	A.g.clamitans
29	Santa Catarina, Brazil	Papanduva	-26.4987	-50.1714	1	A.g.clamitans	A.g.clamitans	A.clamitans (=A.g.clamitans)	A.g.clamitans
30	Santa Catarina, Brazil	Massaranduba	-26.6264	-48.9883	1	A.g.clamitans	A.g.clamitans	A.clamitans (=A.g.clamitans)	A.g.clamitans
31	Santa Catarina, Brazil	Pomerode	-26.7286	-49.1733	9	A.g.clamitans	A.g.clamitans	A.clamitans (=A.g.clamitans)	A.g.clamitans
32	Santa Catarina, Brazil	Vila Itoupava, Blumenau	-26.7291	-49.0606	3	A.g.clamitans	A.g.clamitans	A.clamitans (=A.g.clamitans)	A.g.clamitans
33	Santa Catarina, Brazil	Itoupavazinha, Blumenau	-26.8469	-49.1098	8	A.g.clamitans	A.g.clamitans	A.clamitans (=A.g.clamitans)	A.g.clamitans
34	Santa Catarina, Brazil	Morro Geisler, Indaial	-26.8982	-49.2213	11	A.g.clamitans	A.g.clamitans	A.clamitans (=A.g.clamitans)	A.g.clamitans
35	Santa Catarina, Brazil	Encano Baixo, Indaial	-26.8983	-49.1646	1	A.g.clamitans	A.g.clamitans	A.clamitans (=A.g.clamitans)	A.g.clamitans
36	Santa Catarina, Brazil	Gaspar	-26.931	-48.9658	1	A.g.clamitans	A.g.clamitans	A.clamitans (=A.g.clamitans)	A.g.clamitans
37	Santa Catarina, Brazil	Ascurra	-26.9734	-49.3956	2	A.g.clamitans	A.g.clamitans	A.clamitans (=A.g.clamitans)	A.g.clamitans
38	Santa Catarina, Brazil	Taio	-27.0787	-50.0927	1	A.g.clamitans	A.g.clamitans	A.clamitans (=A.g.clamitans)	A.g.clamitans
39	Santa Catarina, Brazil	Brusque	-27.1247	-48.9097	1	A.g.clamitans	A.g.clamitans	A.clamitans (=A.g.clamitans)	A.g.clamitans
40	Santa Catarina, Brazil	Florianópolis	-27.5779	-48.5082	2	A.g.clamitans	A.g.clamitans	A.clamitans (=A.g.clamitans)	A.g.clamitans
41	Santa Catarina, Brazil	São Bonifácio	-27.9562	-48.9399	1	A.g.clamitans	A.g.clamitans	A.clamitans (=A.g.clamitans)	A.g.clamitans
42	Santa Catarina, Brazil	Lages	-28.0201	-50.3409	2	A.g.clamitans	A.g.clamitans	A.clamitans (=A.g.clamitans)	A.g.clamitans
43	Santa Catarina, Brazil	Braço do Norte	-28.2409	-49.1428	1	A.g.clamitans	A.g.clamitans	A.clamitans (=A.g.clamitans)	A.g.clamitans
44	Santa Catarina, Brazil	Laguna	-28.486	-48.826	3	A.g.clamitans	A.g.clamitans	A.clamitans (=A.g.clamitans)	A.g.clamitans
45	Rio Grande do Sul, Brazil	Canela	-29.3519	-50.7749	1	A.g.clamitans	A.g.clamitans	A.clamitans (=A.g.clamitans)	A.g.clamitans
46	Rio Grande do Sul, Brazil	Perseverança, São Francisco de Assis	-29.4701	-55.045	1	A.g.clamitans	A.g.clamitans	A.clamitans (=A.g.clamitans)	A.g.clamitans
47	Rio Grande do Sul, Brazil	Balneário, Jaguari	-29.4935	-54.6899	5	A.g.clamitans	A.g.clamitans	A.clamitans (=A.g.clamitans)	A.g.clamitans
48	Rio Grande do Sul, Brazil	Reserva, São Francisco de Assis	-29.5277	-55.0002	2	A.g.clamitans	A.g.clamitans	A.clamitans (=A.g.clamitans)	A.g.clamitans
49	Rio Grande do Sul, Brazil	Cerro Negro, São Francisco de Assis	-29.6135	-54.9706	3	A.g.clamitans	A.g.clamitans	A.clamitans (=A.g.clamitans)	A.g.clamitans
50	Rio Grande do Sul, Brazil	Jacaqua, São Francisco de Assis	-29.6641	-55.1661	1	A.g.clamitans	A.g.clamitans	A.clamitans (=A.g.clamitans)	A.g.clamitans
51	Rio Grande do Sul, Brazil	Cerro Loreto, São Vicente do Sul	-29.7106	-54.9018	11	A.g.clamitans	A.g.clamitans	A.clamitans (=A.g.clamitans)	A.g.clamitans
52	Rio Grande do Sul, Brazil	Cerro Agudo, São Vicente do Sul	-29.7122	-54.903	2	A.g.clamitans	A.g.clamitans	A.clamitans (=A.g.clamitans)	A.g.clamitans
53	Rio Grande do Sul, Brazil	Gravatá 2, Santa Maria	-29.7357	-53.8288	2	A.g.clamitans	A.g.clamitans	A.clamitans (=A.g.clamitans)	A.g.clamitans
54	Rio Grande do Sul, Brazil	Sede, Santa Maria	-29.7383	-53.843	1	A.g.clamitans	A.g.clamitans	A.clamitans (=A.g.clamitans)	A.g.clamitans
55	Rio Grande do Sul, Brazil	São Leopoldo	-29.7554	-51.145	1	A.g.clamitans	A.g.clamitans	A.clamitans (=A.g.clamitans)	A.g.clamitans
56	Rio Grande do Sul, Brazil	Capão da Infantaria, Santa Maria	-29.7575	-53.8773	3	A.g.clamitans	A.g.clamitans	A.clamitans (=A.g.clamitans)	A.g.clamitans
57	Rio Grande do Sul, Brazil	Piquenique, Santa Maria	-29.7789	-53.8304	3	A.g.clamitans	A.g.clamitans	A.clamitans (=A.g.clamitans)	A.g.clamitans
58	Rio Grande do Sul, Brazil	Esteio	-29.8517	-51.1768	1	A.g.clamitans	A.g.clamitans	A.clamitans (=A.g.clamitans)	A.g.clamitans
59	Rio Grande do Sul, Brazil	RS290 km161, Butiá	-30.1328	-51.9383	1	A.g.clamitans	A.g.clamitans	A.clamitans (=A.g.clamitans)	A.g.clamitans
60	Rio Grande do Sul, Brazil	Águas Claras, Viamão	-30.1737	-50.882	2	A.g.clamitans	A.g.clamitans	A.clamitans (=A.g.clamitans)	A.g.clamitans
61	Rio Grande do Sul, Brazil	Arroio dos Ratos	-30.1932	-51.7519	1	A.g.clamitans	A.g.clamitans	A.clamitans (=A.g.clamitans)	A.g.clamitans
62	Rio Grande do Sul, Brazil	Morro Extrema, Porto Alegre	-30.2005	-51.0754	1	A.g.clamitans	A.g.clamitans	A.clamitans (=A.g.clamitans)	A.g.clamitans
63	Rio Grande do Sul, Brazil	Lami, Porto Alegre	-30.2481	-51.0678	8	A.g.clamitans	A.g.clamitans	A.clamitans (=A.g.clamitans)	A.g.clamitans
64	Rio Grande do Sul, Brazil	Itapuã, Viamão	-30.354	-51.0105	7	A.g.clamitans	A.g.clamitans	A.clamitans (=A.g.clamitans)	A.g.clamitans
65	Misiones, Argentina	Parque Provincial Piñalito	-26.5	-53.8333	5	A.g.clamitans	A.g.clamitans	A.clamitans (=A.g.clamitans)	A.g.clamitans
					223
